# Supplementary material for: The role of alternative splicing in CEP290-related disease pathogenesis
Source: bioRxiv or medRxiv preprint supplement (doi:10.1101/2022.03.03.22271834), 2022-03-04
Supplement: Supplementary file [file media-1.pdf]

## Supplementary Tables

### Supplementary Table 1

| Chr12<br>GRCH38 | Exon | Variant        | Protein                 | Class   | ClinVar listed<br>phenotypes       | Published<br>Phenotype | Allele 1                   | Allele 2                                | Source                                                                                                                                |
|-----------------|------|----------------|-------------------------|---------|------------------------------------|------------------------|----------------------------|-----------------------------------------|---------------------------------------------------------------------------------------------------------------------------------------|
| 88050409        | 53   | c.7153del      | p.Lys2384_ile2385insTer | P       | JBTS, MKS, NPHP                    | N/A                    |                            |                                         |                                                                                                                                       |
| 88053703        | 52   | c.7073_7077dup | p.His2360Ter            | P       | NPHP, MKS, JBTS                    | N/A                    |                            |                                         |                                                                                                                                       |
| 88053733        | 52   | c.7048C>T      | p.Gln2350Ter            | LP      | not provided                       | LCA                    | c.7048C>T,<br>p.Gln2350Ter | c.4029+1G>A                             | <a href="https://www.ajo.com/article/S0002-9394(19)30551-3/fulltext">https://www.ajo.com/article/S0002-9394(19)30551-3/fulltext</a>   |
|                 |      |                |                         |         |                                    | Retinal Dystrophy      | c.7048C>T,<br>p.Gln2350Ter | c.1711G>A,<br>p.Gly571Arg               | <a href="https://www.ncbi.nlm.nih.gov/pmc/articles/PMC5565704/">https://www.ncbi.nlm.nih.gov/pmc/articles/PMC5565704/</a>             |
| 88055597        | 50   | c.6939C>A      | p.Tyr2313Ter            | P       | JBTS                               | JBTS                   | c.6939C>A,<br>p.Tyr2313Ter | c.1219_1220delAT,<br>p.Met407GlufsTer14 | <a href="https://www.ncbi.nlm.nih.gov/pmc/articles/PMC5082428/">https://www.ncbi.nlm.nih.gov/pmc/articles/PMC5082428/</a>             |
| 88055644        | 50   | c.6892C>T      | p.Gln2298Ter            | LP      | Retinal Dystrophy                  | N/A                    |                            |                                         |                                                                                                                                       |
| 88055665        | 50   | c.6871C>T      | p.Gln2291Ter            | LP      | LCA                                | LCA                    | c.6871C>T,<br>p.Gln2291Ter | c.180+1G>A                              | <a href="https://www.ncbi.nlm.nih.gov/pmc/articles/PMC6362094/">https://www.ncbi.nlm.nih.gov/pmc/articles/PMC6362094/</a>             |
| 88055700        | 50   | c.6836T>A      | p.Leu2279Ter            | P/LP    | Retinal Dystrophy, JBTS, MKS, NPHP | N/A                    |                            |                                         |                                                                                                                                       |
| 88058868        | 49   | c.6798G>A      | p.Trp2266Ter            | P       | JBTS, NPHP, MKS                    | Episodic Ataxia        | c.6798G>A, p.Trp2266Ter    | c.2174A>C,<br>p.Glu725Ala               | <a href="https://onlinelibrary.wiley.com/doi/full/10.1002/mdc3.12872">https://onlinelibrary.wiley.com/doi/full/10.1002/mdc3.12872</a> |
| 88058869        | 49   | c.6797G>A      | p.Trp2266Ter            | P       | not provided                       | N/A                    |                            |                                         |                                                                                                                                       |
| 88059909        | 48   | c.6634G>T      | p.Glu2212Ter            | P       | NPHP, MKS, JBTS                    | N/A                    |                            |                                         |                                                                                                                                       |
| 88060988        | 47   | c.6364A>T      | p.Arg2122Ter            | P       | not provided                       | N/A                    |                            |                                         |                                                                                                                                       |
| 88062718        | 46   | c.6331C>T      | p.Gln2111Ter            | unknown | not provided                       | JSRD                   | c.6331C>T,<br>p.Gln2111Ter | ?                                       | <a href="https://www.nature.com/articles/ng1786/tables/1">https://www.nature.com/articles/ng1786/tables/1</a>                         |
| 88068585        | 44   | c.6072C>A      | p.Tyr2024Ter            | P       | JBTS                               | JSRD                   | c.6072C>A,<br>p.Tyr2024Ter | c.7321dupCTCT,<br>p.Ley2440fsTer2456    | <a href="https://www.cell.com/ajhg/fulltext/S0002-9297(07)62820-1">https://www.cell.com/ajhg/fulltext/S0002-9297(07)62820-1</a>       |
|                 |      |                |                         |         |                                    | JSRD                   | c.6072C>A,<br>p.Tyr2024Ter | ?                                       | <a href="https://www.ncbi.nlm.nih.gov/pmc/articles/PMC5682233/">https://www.ncbi.nlm.nih.gov/pmc/articles/PMC5682233/</a>             |
| 88068626        | 44   | c.6031C>T      | p.Arg2011Ter            | P       | not provided                       | JSRD                   | c.6031C>T,<br>p.Arg2011Ter | c.1657_1666delA,<br>p.Leu552fsTer572    | <a href="https://www.cell.com/ajhg/fulltext/S0002-9297(07)62820-1">https://www.cell.com/ajhg/fulltext/S0002-9297(07)62820-1</a>       |

|          |    |           |              |      |                                                 |      |                                       |                                       |                                                                                                                                                                                                        |
|----------|----|-----------|--------------|------|-------------------------------------------------|------|---------------------------------------|---------------------------------------|--------------------------------------------------------------------------------------------------------------------------------------------------------------------------------------------------------|
|          |    |           |              |      |                                                 | RP   | c.6031C>T,<br>p.Arg2011Ter            | ?                                     | <a href="https://www.aajournal.org/article/S0161-6420(19)30438-5/fulltext#supplementaryMaterial">https://www.aajournal.org/article/S0161-6420(19)30438-5/fulltext#supplementaryMaterial</a>            |
| 88071373 | 43 | c.5932C>T | p.Arg1978Ter | P    | JBTS                                            | SLS  | c.5932C>T,<br>p.Arg1978Ter            | ?                                     | <a href="https://www.ncbi.nlm.nih.gov/pmc/articles/PMC2597962/">https://www.ncbi.nlm.nih.gov/pmc/articles/PMC2597962/</a>                                                                              |
|          |    |           |              |      |                                                 | JSRD | c.5932C>T,<br>p.Arg1978Ter            | c.164_167delCTCA,<br>p.Thr55SerfsTer3 | <a href="https://www.ncbi.nlm.nih.gov/pmc/articles/PMC5082428/">https://www.ncbi.nlm.nih.gov/pmc/articles/PMC5082428/</a>                                                                              |
| 88071833 | 42 | c.5803G>T | p.Glu1935Ter | P    | LCA                                             | N/A  |                                       |                                       |                                                                                                                                                                                                        |
| 88071848 | 42 | c.5788A>T | p.Lys1930Ter | P    | LCA                                             | JSRD | c.5788A>T,<br>p.Lys1930Ter            | c.6012-12A>T                          | <a href="https://www.nature.com/articles/jhg2012117">https://www.nature.com/articles/jhg2012117</a>                                                                                                    |
| 88071860 | 42 | c.5776C>T | p.Arg1926Ter | P/LP | NPHP, MKS, JBTS                                 | LCA  | c.5776C>T,<br>p.Arg1926Ter            | ?                                     | <a href="https://www.ajo.com/article/S0002-9394(07)00767-2/fulltext">https://www.ajo.com/article/S0002-9394(07)00767-2/fulltext</a>                                                                    |
| 88071890 | 42 | c.5745dup | p.Lys1916Ter | P    | NPHP, MKS, JBTS                                 | N/A  |                                       |                                       |                                                                                                                                                                                                        |
| 88077224 | 41 | c.5707A>T | p.Lys1903Ter | P    | NPHP                                            | BBS  | <b>c.5707A&gt;T,<br/>p.Lys1903Ter</b> | <b>c.5707A&gt;T,<br/>p.Lys1903Ter</b> |                                                                                                                                                                                                        |
| 88077227 | 41 | c.5704G>T | p.Glu1902Ter | P    | BBS, JBTS                                       | JSRD | <b>c.5704G&gt;T,<br/>p.Glu1902Ter</b> | <b>c.5704G&gt;T,<br/>p.Glu1902Ter</b> | <a href="https://pubmed.ncbi.nlm.nih.gov/26092869/">https://pubmed.ncbi.nlm.nih.gov/26092869/</a><br><a href="https://pubmed.ncbi.nlm.nih.gov/31464256/">https://pubmed.ncbi.nlm.nih.gov/31464256/</a> |
| 88077263 | 41 | c.5668G>T | p.Gly1890Ter | P    | SLS, JBTS, Retinal Dystrophy, MKS, LCA, RP, MKS | LCA  | c.5668G>T,<br>p.Gly1890Ter            | c.2991+1665A>G,<br>p.Cys998Ter        | <a href="https://www.ajo.com/article/S0002-9394(19)30551-3/fulltext">https://www.ajo.com/article/S0002-9394(19)30551-3/fulltext</a>                                                                    |
|          |    |           |              |      |                                                 | JSRD | <b>c.5668G&gt;T,<br/>p.Gly1890Ter</b> | <b>c.5668G&gt;T,<br/>p.Gly1890Ter</b> | <a href="https://www.nature.com/articles/ng1786/tables/1">https://www.nature.com/articles/ng1786/tables/1</a>                                                                                          |
|          |    |           |              |      |                                                 | JSRD | <b>c.5668G&gt;T,<br/>p.Gly1890Ter</b> | <b>c.5668G&gt;T,<br/>p.Gly1890Ter</b> | <a href="https://jmg.bmj.com/content/53/11/761.long">https://jmg.bmj.com/content/53/11/761.long</a>                                                                                                    |
|          |    |           |              |      |                                                 | JSRD | c.5668G>T,<br>p.Gly1890Ter            | c.1189G>A,<br>p.Gly397Ser             | <a href="https://www.ncbi.nlm.nih.gov/pmc/articles/PMC4037742/">https://www.ncbi.nlm.nih.gov/pmc/articles/PMC4037742/</a>                                                                              |
|          |    |           |              |      |                                                 | JSRD | c.5668G>T,<br>p.Gly1890Ter            | c.4656del1,<br>p.Lys1552fsTer1923     | <a href="https://www.ncbi.nlm.nih.gov/pmc/articles/PMC4037742/">https://www.ncbi.nlm.nih.gov/pmc/articles/PMC4037742/</a>                                                                              |
|          |    |           |              |      |                                                 | RP   | <b>c.5668G&gt;T,<br/>p.Gly1890Ter</b> | <b>c.5668G&gt;T,<br/>p.Gly1890Ter</b> | <a href="https://www.ncbi.nlm.nih.gov/pmc/articles/PMC6362094/">https://www.ncbi.nlm.nih.gov/pmc/articles/PMC6362094/</a>                                                                              |
| 88079112 | 39 | c.5344C>T | p.Arg1782Ter | P    | JBTS, NPHP, MKS, LCA, BBS, SLS                  | LCA  | c.5344C>T,<br>p.Arg1782Ter            | c.2991+1665A>G,<br>p.Cys998Ter        | <a href="https://www.ncbi.nlm.nih.gov/pmc/articles/PMC3048164/">https://www.ncbi.nlm.nih.gov/pmc/articles/PMC3048164/</a>                                                                              |
|          |    |           |              |      |                                                 | JSRD | c.5344C>T,<br>p.Arg1782Ter            | c.1666dupA,<br>p.Ile556AsnfsTer20     | <a href="https://pubmed.ncbi.nlm.nih.gov/26092869/">https://pubmed.ncbi.nlm.nih.gov/26092869/</a>                                                                                                      |
| 88080196 | 38 | c.5212G>T | p.Glu1738Ter | P    | NPHP, MKS, JBTS                                 | N/A  |                                       |                                       |                                                                                                                                                                                                        |

|          |    |           |              |                 |                                   |                                                                            |                                       |                                               |                                                                                                                                         |
|----------|----|-----------|--------------|-----------------|-----------------------------------|----------------------------------------------------------------------------|---------------------------------------|-----------------------------------------------|-----------------------------------------------------------------------------------------------------------------------------------------|
| 88080226 | 38 | c.5182G>T | p.Glu1728Ter | P               | NPHP, MKS, JBTS                   | SECORD                                                                     | c.5182G>T,<br>p.Glu1782Ter            | c.508A>T,<br>p.Lys170Ter                      | <a href="https://www.ncbi.nlm.nih.gov/pmc/articles/PMC5565704/">https://www.ncbi.nlm.nih.gov/pmc/articles/PMC5565704/</a>               |
| 88083083 | 37 | c.4960C>T | p.Gln1654Ter | P               | LCA                               | LCA                                                                        | c.4960C>T,<br>p.Gln1654Ter            | c.2991+1665A>G,<br>p.Cys998Ter                | <a href="https://www.nature.com/articles/ejhg20179#MOESM236">https://www.nature.com/articles/ejhg20179#MOESM236</a>                     |
| 88083161 | 37 | c.4882C>T | p.Gln1628Ter | P               | JBTS, SLS, BBS,<br>MKS, LCA, NPHP | LCA                                                                        | c.4882C>T,<br>p.Gln1628Ter            | c.2991+1665A>G,<br>p.Cys998Ter                | <a href="https://www.ajo.com/article/S0002-9394(19)30551-3/fulltext">https://www.ajo.com/article/S0002-9394(19)30551-3/fulltext</a>     |
|          |    |           |              |                 |                                   | JSRD                                                                       | c.4882C>T,<br>p.Gln1628Ter            | c.5941G>T,<br>p.Glu1981Ter                    | <a href="https://www.ncbi.nlm.nih.gov/pmc/articles/PMC4037742/#SD1">https://www.ncbi.nlm.nih.gov/pmc/articles/PMC4037742/#SD1</a>       |
|          |    |           |              |                 |                                   | JSRD                                                                       | c.4882C>T,<br>p.Gln1628Ter            | c.5611_5614delCA<br>AA,<br>p.Gln1871ValfsTer2 | <a href="https://pubmed.ncbi.nlm.nih.gov/26092869/">https://pubmed.ncbi.nlm.nih.gov/26092869/</a>                                       |
| 88083848 | 36 | c.4811G>A | p.Trp1604Ter | P               | JBTS                              | JSRD                                                                       | <b>c.4811G&gt;A,<br/>p.Trp1604Ter</b> | <b>c.4811G&gt;A,<br/>p.Trp1604Ter</b>         | <a href="https://www.ncbi.nlm.nih.gov/pmc/articles/PMC5126998/">https://www.ncbi.nlm.nih.gov/pmc/articles/PMC5126998/</a>               |
| 88083858 | 36 | c.4801C>T | p.Gln1601Ter | LP              | Retinal Dystrophy                 | LCA                                                                        | c.4801C>T,<br>p.Gln1601Ter            | c.2991+1665A>G,<br>p.Cys998Ter                | <a href="https://jmg.bmj.com/content/53/11/761.long">https://jmg.bmj.com/content/53/11/761.long</a>                                     |
| 88083888 | 36 | c.4771C>T | p.Gln1591Ter | P               | LCA                               | JSRD                                                                       | c.4771C>T,<br>p.Gln1591Ter            | ?                                             | <a href="https://www.nature.com/articles/ng1786/tables/1">https://www.nature.com/articles/ng1786/tables/1</a>                           |
|          |    |           |              |                 |                                   | LCA                                                                        | <b>c.4771C&gt;T,<br/>p.Gln1591Ter</b> | <b>c.4771C&gt;T,<br/>p.Gln1591Ter</b>         | <a href="https://iovs.arvojournals.org/article.aspx?articleid=2189538">https://iovs.arvojournals.org/article.aspx?articleid=2189538</a> |
| 88083927 | 36 | c.4732G>T | p.Glu1578Ter | not<br>provided | not provided                      | JSRD                                                                       | <b>c.4732G&gt;T,<br/>p.Glu1578Ter</b> | <b>c.4732G&gt;T,<br/>p.Glu1578Ter</b>         | <a href="https://www.nature.com/articles/ng1805#MOESM1">https://www.nature.com/articles/ng1805#MOESM1</a>                               |
|          |    |           |              |                 |                                   | LCA                                                                        | c.4732G>T,<br>p.Glu1578Ter            | c.3012delA,<br>p.Lys1004fs                    | <a href="https://www.ncbi.nlm.nih.gov/pmc/articles/PMC5664130/">https://www.ncbi.nlm.nih.gov/pmc/articles/PMC5664130/</a>               |
| 88083936 | 36 | c.4723A>T | p.Lys1575Ter | P               | JBTS, NPHP, LCA,<br>MKS, SLS      | LCA                                                                        | c.4723A>T,<br>p.Lys1575Ter            | c.2991+1665A>G,<br>p.Cys998Ter                | <a href="https://www.ajo.com/article/S0002-9394(19)30551-3/fulltext">https://www.ajo.com/article/S0002-9394(19)30551-3/fulltext</a>     |
|          |    |           |              |                 |                                   | LCA                                                                        | <b>c.4723A&gt;T,<br/>p.Lys1575Ter</b> | <b>c.4723A&gt;T,<br/>p.Lys1575Ter</b>         | <a href="https://www.ncbi.nlm.nih.gov/pmc/articles/PMC3048164/">https://www.ncbi.nlm.nih.gov/pmc/articles/PMC3048164/</a>               |
|          |    |           |              |                 |                                   | LCA                                                                        | c.4723A>T,<br>p.Lys1575Ter            | c.4696G>C,<br>p.Ala1566Pro                    | <a href="https://www.ncbi.nlm.nih.gov/pmc/articles/PMC3048164/">https://www.ncbi.nlm.nih.gov/pmc/articles/PMC3048164/</a>               |
|          |    |           |              |                 |                                   | LCA                                                                        | c.4723A>T,<br>p.Lys1575Ter            | c.1709C>G,<br>p.Ser570Ter                     | <a href="https://onlinelibrary.wiley.com/doi/epdf/10.1002/humu.9485">https://onlinelibrary.wiley.com/doi/epdf/10.1002/humu.9485</a>     |
|          |    |           |              |                 |                                   | SLS                                                                        | c.4723A>T,<br>p.Lys1575Ter            | c.1984C>T,<br>p.Gln662Ter                     | <a href="https://www.ncbi.nlm.nih.gov/pmc/articles/PMC4643834/">https://www.ncbi.nlm.nih.gov/pmc/articles/PMC4643834/</a>               |
|          |    |           |              |                 |                                   | Liver fibrosis,<br>intellectual<br>disability,<br>nystagmus,<br>strabismus | c.4723A>T,<br>p.Lys1575Ter            | c.1936C>T,<br>p.Gln646Ter                     | <a href="https://www.ncbi.nlm.nih.gov/pmc/articles/PMC4643834/">https://www.ncbi.nlm.nih.gov/pmc/articles/PMC4643834/</a>               |
|          |    |           |              |                 |                                   | SLS                                                                        | c.4723A>T,<br>p.Lys1575Ter            | c.4393C>T,<br>p.Arg1465Ter                    | <a href="https://www.ncbi.nlm.nih.gov/pmc/articles/PMC3048164/">https://www.ncbi.nlm.nih.gov/pmc/articles/PMC3048164/</a>               |

|          |    |                |                         |    |                                |                   |                            |                                        |                                                                                                                                                                                                                                                                                                                                                                                                           |
|----------|----|----------------|-------------------------|----|--------------------------------|-------------------|----------------------------|----------------------------------------|-----------------------------------------------------------------------------------------------------------------------------------------------------------------------------------------------------------------------------------------------------------------------------------------------------------------------------------------------------------------------------------------------------------|
|          |    |                |                         |    |                                | JSRD              | c.4723A>T,<br>p.Lys1575Ter | c.4393C>T,<br>p.Arg1465Ter             | <a href="https://www.ncbi.nlm.nih.gov/pmc/articles/PMC1950920/">https://www.ncbi.nlm.nih.gov/pmc/articles/PMC1950920/</a>                                                                                                                                                                                                                                                                                 |
|          |    |                |                         |    |                                | JSRD              | c.4522C>T,<br>p.Arg1508Ter | c.4723A>T,<br>p.Lys1575Ter             | <a href="https://www.ncbi.nlm.nih.gov/pmc/articles/PMC5082428/">https://www.ncbi.nlm.nih.gov/pmc/articles/PMC5082428/</a>                                                                                                                                                                                                                                                                                 |
|          |    |                |                         |    |                                | SLS               | c.4723A>T,<br>p.Lys1575Ter | c.1987A>T,<br>p.Gln663Ter              | <a href="https://www.researchgate.net/publication/233788878_High-throughput_mutation_analysis_in_patients_with_a_nephronophthisis_associated_ciliopathy_applying_multiplexed_bar_coded_array-based_PCR">https://www.researchgate.net/publication/233788878_High-throughput_mutation_analysis_in_patients_with_a_nephronophthisis_associated_ciliopathy_applying_multiplexed_bar_coded_array-based_PCR</a> |
|          |    |                |                         |    |                                | SLS               | c.4723A>T,<br>p.Lys1575Ter | c.3802C>T,<br>p.Gln1268Ter             | <a href="https://www.researchgate.net/publication/233788878_High-throughput_mutation_analysis_in_patients_with_a_nephronophthisis_associated_ciliopathy_applying_multiplexed_bar_coded_array-based_PCR">https://www.researchgate.net/publication/233788878_High-throughput_mutation_analysis_in_patients_with_a_nephronophthisis_associated_ciliopathy_applying_multiplexed_bar_coded_array-based_PCR</a> |
|          |    |                |                         |    |                                | SLS               | c.4723A>T,<br>p.Lys1575Ter | c.1189+1G>A                            | <a href="https://www.ncbi.nlm.nih.gov/pmc/articles/PMC4643834/">https://www.ncbi.nlm.nih.gov/pmc/articles/PMC4643834/</a>                                                                                                                                                                                                                                                                                 |
|          |    |                |                         |    |                                | Retinal Dystrophy | c.4723A>T,<br>p.Lys1575Ter | c.6599delA,<br>p.Glu2200del1gA         | <a href="https://www.ncbi.nlm.nih.gov/pmc/articles/PMC5565704/">https://www.ncbi.nlm.nih.gov/pmc/articles/PMC5565704/</a>                                                                                                                                                                                                                                                                                 |
| 88084768 | 35 | c.4522C>T      | p.Arg1508Ter            | P  | JBTS, MKS, NPHP                | JSRD              | c.4522C>T,<br>p.Arg1508Ter | c.4723A>T,<br>p.Lys1575Ter             | <a href="https://www.ncbi.nlm.nih.gov/pmc/articles/PMC5082428/">https://www.ncbi.nlm.nih.gov/pmc/articles/PMC5082428/</a>                                                                                                                                                                                                                                                                                 |
| 88084800 | 35 | c.4490C>A      | p.Ser1497Ter            | LP | Retinal Dystrophy              | N/A               |                            |                                        |                                                                                                                                                                                                                                                                                                                                                                                                           |
| 88086083 | 34 | c.4393C>T      | p.Arg1465Ter            | P  | JBTS, LCA, NPHP, MKS, SLS, BBS | LCA               | c.4393C>T,<br>p.Arg1465Ter | c.2991+1665A>G,<br>p.Cys998Ter         | <a href="https://www.ncbi.nlm.nih.gov/pmc/articles/PMC3048164/">https://www.ncbi.nlm.nih.gov/pmc/articles/PMC3048164/</a>                                                                                                                                                                                                                                                                                 |
|          |    |                |                         |    |                                | JSRD              | c.4393C>T,<br>p.Arg1465Ter | c.4723A>T,<br>p.Lys1575Ter             | <a href="https://www.ncbi.nlm.nih.gov/pmc/articles/PMC1950920/">https://www.ncbi.nlm.nih.gov/pmc/articles/PMC1950920/</a>                                                                                                                                                                                                                                                                                 |
| 88086415 | 33 | c.4276_4277del | p.Gln1425_Asn1426insTer | P  | JBTS                           | N/A               |                            |                                        |                                                                                                                                                                                                                                                                                                                                                                                                           |
| 88086450 | 33 | c.4243G>T      | p.Glu1415Ter            | LP | MKS, LCA, JBTS, BBS, SLS       | JSRD              | c.4243G>T,<br>p.Glu1415Ter | ?                                      | <a href="https://pubmed.ncbi.nlm.nih.gov/29754767/">https://pubmed.ncbi.nlm.nih.gov/29754767/</a>                                                                                                                                                                                                                                                                                                         |
| 88087788 | 32 | c.4186C>T      | p.Gln1396Ter            | P  | JBTS, NPHP, MKS                | N/A               |                            |                                        |                                                                                                                                                                                                                                                                                                                                                                                                           |
| 88087934 | 32 | c.4040G>A      | p.Trp1347Ter            | P  | NPHP, JBTS, MKS                | RP                | c.4040G>A,<br>p.Trp1347Ter | c.3104-2delA                           | <a href="https://www.spandidos-publications.com/mmr/11/3/1827">https://www.spandidos-publications.com/mmr/11/3/1827</a>                                                                                                                                                                                                                                                                                   |
| 88089118 | 31 | c.3943G>T      | p.Glu1315Ter            | P  | not provided                   | N/A               |                            |                                        |                                                                                                                                                                                                                                                                                                                                                                                                           |
| 88089157 | 31 | c.3904C>T      | p.Gln1302Ter            | P  | JBTS, LCA                      | LCA               | c.3904C>T,<br>p.Gln1302Ter | c.6869_6870insA,<br>p.Asn2290LysfsTer6 | <a href="https://www.jmdjournal.org/article/S1525-1578(14)00176-7/fulltext">https://www.jmdjournal.org/article/S1525-1578(14)00176-7/fulltext</a>                                                                                                                                                                                                                                                         |

|          |    |                     |                         |      |                          |                             |                                      |                                                |                                                                                                                                                                                                                                                                                                                                                                                                           |
|----------|----|---------------------|-------------------------|------|--------------------------|-----------------------------|--------------------------------------|------------------------------------------------|-----------------------------------------------------------------------------------------------------------------------------------------------------------------------------------------------------------------------------------------------------------------------------------------------------------------------------------------------------------------------------------------------------------|
|          |    |                     |                         |      |                          | LCA                         | c.3904C>T,<br>p.Gln1302Ter           | c.4661_4663del,<br>p.Glu1544del and<br>c.-1G>A | <a href="https://www.ncbi.nlm.nih.gov/pmc/articles/PMC7043639/">https://www.ncbi.nlm.nih.gov/pmc/articles/PMC7043639/</a>                                                                                                                                                                                                                                                                                 |
|          |    |                     |                         |      |                          | JSRD                        | c.3904C>T,<br>p.Gln1302Ter           | c.1666delA,<br>p.Ile556Phefs*17                | <a href="https://www.ncbi.nlm.nih.gov/pmc/articles/PMC5082428/">https://www.ncbi.nlm.nih.gov/pmc/articles/PMC5082428/</a>                                                                                                                                                                                                                                                                                 |
| 88089166 | 31 | c.3894dup           | p.Lys1299Ter            | P/LP | MKS, NPHP, JBTS          | JSRD                        | <b>c.3894dup,<br/>p.Lys1299Ter</b>   | <b>c.3894dup,<br/>p.Lys1299Ter</b>             | <a href="https://www.nature.com/articles/ejhg2016146#Sec17">https://www.nature.com/articles/ejhg2016146#Sec17</a>                                                                                                                                                                                                                                                                                         |
| 88089247 | 31 | c.3814C>T           | p.Arg1272Ter            | P    | NPHP, MKS, JBTS          | LCA                         | c.3814C>T,<br>p.Arg1272Ter           | c.2991+1665A>G,<br>p.Cys998Ter                 | <a href="https://linkinghub.elsevier.com/retrieve/pii/S0002-9297(07)62755-4">https://linkinghub.elsevier.com/retrieve/pii/S0002-9297(07)62755-4</a>                                                                                                                                                                                                                                                       |
| 88089259 | 31 | c.3802C>T           | p.Gln1268Ter            | P    | NPHP, MKS, JBTS          | SLS                         | c.3802C>T,<br>p.Gln1268Ter           | c.4723A>T,<br>p.Lys1575Ter                     | <a href="https://www.researchgate.net/publication/233788878_High-throughput_mutation_analysis_in_patients_with_a_nephronophthisis_associated_ciliopathy_applying_multiplexed_bar-coded_array-based_PCR">https://www.researchgate.net/publication/233788878_High-throughput_mutation_analysis_in_patients_with_a_nephronophthisis_associated_ciliopathy_applying_multiplexed_bar-coded_array-based_PCR</a> |
| 88089468 | 31 | c.3593C>A           | p.Ser1198Ter            | P    | NPHP, MKS, JBTS          | N/A                         |                                      |                                                |                                                                                                                                                                                                                                                                                                                                                                                                           |
| 88093839 | 28 | c.3420T>G           | p.Tyr1080Ter            | P    | JBTS, NPHP, MKS          | N/A                         |                                      |                                                |                                                                                                                                                                                                                                                                                                                                                                                                           |
| 88093859 | 28 | c.3220G>T           | p.Glu1074Ter            | LP   | Retinal Dystrophy        | N/A                         |                                      |                                                |                                                                                                                                                                                                                                                                                                                                                                                                           |
| 88093873 | 28 | c.3205_3206delinsTG | p.Glu1069Ter            | P    | NPHP, MKS, JBTS          | N/A                         |                                      |                                                |                                                                                                                                                                                                                                                                                                                                                                                                           |
| 88093888 | 28 | c.3190del           | p.Glu1063_Met1064insTer | P    | NPHP, MKS, JBTS          | MKS                         | <b>c.3190del,<br/>p.Met1064Ter</b>   | <b>c.3190del,<br/>p.Met1064Ter</b>             | <a href="https://academic.oup.com/hmg/article/24/18/5211/687840">https://academic.oup.com/hmg/article/24/18/5211/687840</a>                                                                                                                                                                                                                                                                               |
| 88093903 | 28 | c.3175del           | p.Lys1058_Ile1059insTer | LP   | MKS                      | MKS                         | <b>c.3175del,<br/>p.Ile1059Ter</b>   | <b>c.3175del,<br/>p.Ile1059Ter</b>             | <a href="https://www.ncbi.nlm.nih.gov/pmc/articles/PMC2718326/">https://www.ncbi.nlm.nih.gov/pmc/articles/PMC2718326/</a>                                                                                                                                                                                                                                                                                 |
| 88093955 | 28 | c.3123dup           | p.Lys1042Ter            | P    | not provided             | N/A                         |                                      |                                                |                                                                                                                                                                                                                                                                                                                                                                                                           |
| 88096894 | 27 | c.3097A>T           | p.Lys1033Ter            | LP   | not provided             | LCA                         | c.3097A>T,<br>p.Lys1033Ter           | c.1910-11T>C                                   | <a href="https://pubmed.ncbi.nlm.nih.gov/28714225/">https://pubmed.ncbi.nlm.nih.gov/28714225/</a>                                                                                                                                                                                                                                                                                                         |
| 88102888 | 26 | c.2941C>T           | p.Gln981Ter             | P    | JBTS??                   | N/A                         |                                      |                                                |                                                                                                                                                                                                                                                                                                                                                                                                           |
| 88102918 | 26 | c.2911G>T           | p.Glu971Ter             | P    | not provided             | N/A                         |                                      |                                                |                                                                                                                                                                                                                                                                                                                                                                                                           |
| 88106770 | 25 | c.2722C>T           | p.Arg908Ter             | P    | JBTS, cone-rod dystrophy | Cone-Rod Dystrophy          | <b>c.2722C&gt;T,<br/>p.Arg908Ter</b> | <b>c.2722C&gt;T,<br/>p.Arg908Ter</b>           | <a href="https://www.ncbi.nlm.nih.gov/pmc/articles/PMC6362094/">https://www.ncbi.nlm.nih.gov/pmc/articles/PMC6362094/</a>                                                                                                                                                                                                                                                                                 |
| 88106784 | 25 | c.2708T>G           | p.Leu903Ter             | VUS  | not provided             | N/A                         |                                      |                                                |                                                                                                                                                                                                                                                                                                                                                                                                           |
| 88106887 | 25 | c.2605C>T           | p.Gln869Ter             | P    | JBTS, MKS, NPHP          | Syndromic retinal dystrophy | <b>c.2605C&gt;T,<br/>p.Gln869Ter</b> | <b>c.2605C&gt;T,<br/>p.Gln869Ter</b>           | <a href="https://www.ncbi.nlm.nih.gov/pmc/articles/PMC6978239/">https://www.ncbi.nlm.nih.gov/pmc/articles/PMC6978239/</a>                                                                                                                                                                                                                                                                                 |
| 88111218 | 22 | c.2351T>A           | p.Leu784Ter             | LP   | not provided             | N/A                         |                                      |                                                |                                                                                                                                                                                                                                                                                                                                                                                                           |

|          |    |           |             |    |                                    |                                                                |                                      |                                        |                                                                                                                                         |
|----------|----|-----------|-------------|----|------------------------------------|----------------------------------------------------------------|--------------------------------------|----------------------------------------|-----------------------------------------------------------------------------------------------------------------------------------------|
| 88111318 | 22 | c.2251C>T | p.Arg751Ter | P  | JBTS                               | MKS                                                            | c.2251C>T,<br>p.Arg751Ter            | c.4864_4865delAA,<br>p.Ser820PhefsTer9 | <a href="https://www.ncbi.nlm.nih.gov/pmc/articles/PMC4643834/">https://www.ncbi.nlm.nih.gov/pmc/articles/PMC4643834/</a>               |
|          |    |           |             |    |                                    | JSRD                                                           | c.2251C>T,<br>p.Arg751Ter            | c.6869delA,<br>p.Asn2290fsTer2300      | <a href="https://jasn.asnjournals.org/content/18/5/1566.long">https://jasn.asnjournals.org/content/18/5/1566.long</a>                   |
| 88111320 | 22 | c.2249T>G | p.Leu750Ter | P  | LCA                                | LCA                                                            | c.2249T>G,<br>p.Leu750Ter            | c.2991+1665A>G,<br>p.Cys998Ter         | <a href="https://www.cell.com/ajhg/fulltext/S0002-9297(07)62755-4">https://www.cell.com/ajhg/fulltext/S0002-9297(07)62755-4</a>         |
|          |    |           |             |    |                                    | Retinal Dystrophy                                              | c.2249T>G,<br>p.Leu750Ter            | c.4063C>T,<br>p.Leu750Ter              | <a href="https://www.ncbi.nlm.nih.gov/pmc/articles/PMC5565704/">https://www.ncbi.nlm.nih.gov/pmc/articles/PMC5565704/</a>               |
| 88114488 | 20 | c.1984C>T | p.Gln662Ter | P  | JBTS, NPHP, MKS, LCA, RP           | Retinal Dystrophy                                              | c.1984C>T,<br>p.Gln662Ter            | c.4723A>T,<br>p.Lys1575Ter             | <a href="https://www.ncbi.nlm.nih.gov/pmc/articles/PMC4643834/">https://www.ncbi.nlm.nih.gov/pmc/articles/PMC4643834/</a>               |
|          |    |           |             |    |                                    | LCA                                                            | c.1984C>T,<br>p.Gln662Ter            | c.5587-1G>C                            | <a href="https://www.ncbi.nlm.nih.gov/pmc/articles/PMC6362094/">https://www.ncbi.nlm.nih.gov/pmc/articles/PMC6362094/</a>               |
|          |    |           |             |    |                                    | RP                                                             | <b>c.1984C&gt;T,<br/>p.Gln662Ter</b> | <b>c.1984C&gt;T,<br/>p.Gln662Ter</b>   | <a href="https://www.ncbi.nlm.nih.gov/pmc/articles/PMC6362094/">https://www.ncbi.nlm.nih.gov/pmc/articles/PMC6362094/</a>               |
| 88114536 | 20 | c.1936C>T | p.Gln646Ter | P  | NPHP, JBTS, MKS, Retinal Dystrophy | LCA                                                            | c.1936C>T,<br>p.Gln646Ter            | c.2991+1665A>G,<br>p.Cys998Ter         | <a href="https://www.ajo.com/article/S0002-9394(19)30551-3/fulltext">https://www.ajo.com/article/S0002-9394(19)30551-3/fulltext</a>     |
|          |    |           |             |    |                                    | LCA                                                            | c.1936C>T,<br>p.Gln646Ter            | c.6604delA,<br>p.Ile2203LeufsTer23     | <a href="https://onlinelibrary.wiley.com/doi/epdf/10.1002/humu.9485">https://onlinelibrary.wiley.com/doi/epdf/10.1002/humu.9485</a>     |
|          |    |           |             |    |                                    | Liver fibrosis, intellectual disability, nystagmus, strabismus | c.1936C>T,<br>p.Gln646Ter            | c.4723A>T,<br>p.Lys1575Ter             | <a href="https://www.ncbi.nlm.nih.gov/pmc/articles/PMC4643834/">https://www.ncbi.nlm.nih.gov/pmc/articles/PMC4643834/</a>               |
| 88115149 | 19 | c.1858G>T | p.Glu620Ter | P  | NPHP, MKS, JBTS                    | N/A                                                            |                                      |                                        |                                                                                                                                         |
| 88117076 | 18 | c.1781T>A | p.Leu594Ter | P  | Retinal Dystrophy                  | LCA                                                            | c.1781T>A,<br>p.Leu594Ter            | c.2991+1665A>G,<br>p.Cys998Ter         | <a href="https://www.ncbi.nlm.nih.gov/pmc/articles/PMC5106339/#SM1">https://www.ncbi.nlm.nih.gov/pmc/articles/PMC5106339/#SM1</a>       |
| 88118485 | 17 | c.1709C>G | p.Ser570Ter | LP | not provided                       | LCA                                                            | c.1709C>G,<br>p.Ser570Ter            | c.4723A>T,<br>p.Lys1575Ter             | <a href="https://onlinelibrary.wiley.com/doi/epdf/10.1002/humu.9485">https://onlinelibrary.wiley.com/doi/epdf/10.1002/humu.9485</a>     |
| 88118549 | 17 | c.1645C>T | p.Arg549Ter | P  | JBTS, NPHP, MKS                    | LCA                                                            | c.1645C>T,<br>p.Arg549Ter            | c.4661_4663del,<br>p.Glu1544del        | <a href="https://www.ncbi.nlm.nih.gov/pmc/articles/PMC3283211/">https://www.ncbi.nlm.nih.gov/pmc/articles/PMC3283211/</a>               |
|          |    |           |             |    |                                    | JSRD                                                           | c.1645C>T,<br>p.Arg549Ter            | c.5649insA,<br>Lys1884fsTer1906        | <a href="https://jasn.asnjournals.org/content/18/5/1566.long#T1">https://jasn.asnjournals.org/content/18/5/1566.long#T1</a>             |
|          |    |           |             |    |                                    | JSRD                                                           | c.1645C>T,<br>p.Arg549Ter            | c.5643_5644insA,<br>p.Lys1882ins1gttA  | <a href="https://www.ncbi.nlm.nih.gov/pmc/articles/PMC5565704/">https://www.ncbi.nlm.nih.gov/pmc/articles/PMC5565704/</a>               |
| 88118567 | 17 | c.1627G>T | p.Glu543Ter | P  | JBTS, MKS, NPHP                    | LCA                                                            | c.1627G>T,<br>p.Glu543Ter            | c..367C>T,<br>p.Gln123Ter              | <a href="https://iovs.arvojournals.org/article.aspx?articleid=2624456">https://iovs.arvojournals.org/article.aspx?articleid=2624456</a> |

|          |    |           |                       |              |                                    |                                                 |                                  |                                  |                                                                                                                                         |
|----------|----|-----------|-----------------------|--------------|------------------------------------|-------------------------------------------------|----------------------------------|----------------------------------|-----------------------------------------------------------------------------------------------------------------------------------------|
| 88118660 | 16 | c.1606C>T | p.Gln536Ter           | LP           | JBTS                               | Dandy-Walker malformation and Retinal Dystrophy | <b>c.1606C&gt;T, p.Gln646Ter</b> | <b>c.1606C&gt;T, p.Gln646Ter</b> | <a href="https://www.ncbi.nlm.nih.gov/pmc/articles/PMC4643834/">https://www.ncbi.nlm.nih.gov/pmc/articles/PMC4643834/</a>               |
| 88118673 | 16 | c.1593C>A | p.Tyr531Ter           | P            | not provided                       | LCA                                             | c.1593C>A, p.Tyr531Ter           | c.2T>A, p.Met1Lys                | <a href="https://onlinelibrary.wiley.com/doi/epdf/10.1002/humu.9485">https://onlinelibrary.wiley.com/doi/epdf/10.1002/humu.9485</a>     |
| 88118715 | 16 | c.1550del | p.Asp516_Leu517insTer | not provided | not provided                       | LCA                                             | c.1550del, p.Leu517Ter           | c.2991+1665A>G, p.Cys998Ter      | <a href="https://www.cell.com/ajhg/fulltext/S0002-9297(07)62755-4">https://www.cell.com/ajhg/fulltext/S0002-9297(07)62755-4</a>         |
| 88120162 | 15 | c.1474A>T | p.Lys492Ter           | P            | NPHP, MKS, JBTS                    | N/A                                             |                                  |                                  |                                                                                                                                         |
| 88120207 | 15 | c.1429C>T | p.Arg447Ter           | P/LP         | SLS, JBTS, MKS, LCA, BBS, NPHP     | LCA                                             | c.1429C>T, p.Arg447Ter           | c.2991+1665A>G, p.Cys998Ter      | <a href="https://www.ncbi.nlm.nih.gov/pmc/articles/PMC3625363/">https://www.ncbi.nlm.nih.gov/pmc/articles/PMC3625363/</a>               |
| 88120243 | 15 | c.1393del | p.Glu464_Ile465insTer | P            | NPHP, JBTS, MKS                    | N/A                                             |                                  |                                  |                                                                                                                                         |
| 88120246 | 15 | c.1390G>T | p.Glu464Ter           | P            | JBTS, MKS, NPHP                    | N/A                                             |                                  |                                  |                                                                                                                                         |
| 88125357 | 13 | c.1078C>T | p.Arg360Ter           | P            | NPHP, MKS, JBTS, LCA, SLS, BBS     | LCA                                             | c.1078C>T, p.Arg360Ter           | c.5587-1G>C                      | <a href="https://www.ncbi.nlm.nih.gov/pmc/articles/PMC3283211/">https://www.ncbi.nlm.nih.gov/pmc/articles/PMC3283211/</a>               |
|          |    |           |                       |              |                                    | RP                                              | c.1078C>T, p.Arg360Ter           | c.6851_6855del, p.Thr228AsnfsTer | <a href="https://iovs.arvojournals.org/article.aspx?articleid=2166376">https://iovs.arvojournals.org/article.aspx?articleid=2166376</a> |
| 88125363 | 13 | c.1072C>T | p.Gln358Ter           | P            | JBTS, NPHP, MKS                    | N/A                                             |                                  |                                  |                                                                                                                                         |
| 88129007 | 11 | c.881C>G  | p.Ser294Ter           | P            | JBTS                               | N/A                                             |                                  |                                  |                                                                                                                                         |
| 88129717 | 10 | c.829G>T  | p.Glu277Ter           | LP           | LCA                                | N/A                                             |                                  |                                  |                                                                                                                                         |
| 88130283 | 9  | c.654T>G  | p.Tyr218Ter           | P            | MKS, JBTS                          | JSRD                                            | c.654T>G, p.Tyr218Ter            | c.4723A>T, p.Lys1575Ter          | <a href="https://pubmed.ncbi.nlm.nih.gov/26092869/">https://pubmed.ncbi.nlm.nih.gov/26092869/</a>                                       |
|          |    |           |                       |              |                                    | JSRD                                            | c.654T>G, p.Tyr218Ter            | c.5668G>T, p.Gly1890Ter          | <a href="https://pubmed.ncbi.nlm.nih.gov/26092869/">https://pubmed.ncbi.nlm.nih.gov/26092869/</a>                                       |
| 88130309 | 9  | c.628A>T  | p.Lys210Ter           | LP           | not provided                       | N/A                                             |                                  |                                  |                                                                                                                                         |
| 88130324 | 9  | c.613C>T  | p.Arg205Ter           | P            | MKS, JBTS, NPHP                    | MKS                                             | <b>c.613C&gt;T, p.Arg205Ter</b>  | <b>c.613C&gt;T, p.Arg205Ter</b>  | <a href="https://www.ncbi.nlm.nih.gov/pmc/articles/PMC2718326/">https://www.ncbi.nlm.nih.gov/pmc/articles/PMC2718326/</a>               |
| 88130553 | 8  | c.508A>T  | p.Lys170Ter           | P            | JBTS, NPHP, MKS, Retinal Dystrophy | SECORD                                          | c.508A>T, p.Lys170Ter            | c.5182G>T, p.Glu1728Ter          | <a href="https://www.ncbi.nlm.nih.gov/pmc/articles/PMC5565704/">https://www.ncbi.nlm.nih.gov/pmc/articles/PMC5565704/</a>               |
|          |    |           |                       |              |                                    | LCA                                             | c.508A>T, p.Lys170Ter            | c.4090G>T, p.Glu1364Ter          | <a href="https://pubmed.ncbi.nlm.nih.gov/29771326/">https://pubmed.ncbi.nlm.nih.gov/29771326/</a>                                       |
| 88131209 | 7  | c.451C>T  | p.Arg151Ter           | P/LP         | NPHP, MKS, JBTS                    | LCA                                             | c.451C>T, p.Arg151Ter            | c.2991+1665A>G, p.Cys998Ter      | <a href="https://iovs.arvojournals.org/article.aspx?articleid=2126833">https://iovs.arvojournals.org/article.aspx?articleid=2126833</a> |
|          |    |           |                       |              |                                    | Retinal Dystrophy                               | c.451C>T, p.Arg151Ter            | c.4723A>T, p.Lys1575Ter          | <a href="https://pubmed.ncbi.nlm.nih.gov/28829391/">https://pubmed.ncbi.nlm.nih.gov/28829391/</a>                                       |

|          |   |          |             |    |                                |                   |                           |                                  |                                                                                                                                         |
|----------|---|----------|-------------|----|--------------------------------|-------------------|---------------------------|----------------------------------|-----------------------------------------------------------------------------------------------------------------------------------------|
|          |   |          |             |    |                                | LCA               | c.451C>T,<br>p.Arg151Ter  | c.3181_3182delAT,<br>p.Met1061fs | <a href="https://img.bmj.com/content/53/11/761.long">https://img.bmj.com/content/53/11/761.long</a>                                     |
| 88136717 | 6 | c.367C>T | p.Gln123Ter | P  | JBTS, MKS, NPHP                | LCA               | c.367C>T,<br>p.Gln123Ter  | ?                                | <a href="https://pubmed.ncbi.nlm.nih.gov/21602930/">https://pubmed.ncbi.nlm.nih.gov/21602930/</a>                                       |
|          |   |          |             |    |                                | LCA               | c..367C>T,<br>p.Gln123Ter | c.1627G>T,<br>p.Glu543Ter        | <a href="https://iovs.arvojournals.org/article.aspx?articleid=2624456">https://iovs.arvojournals.org/article.aspx?articleid=2624456</a> |
| 88136762 | 6 | c.322C>T | p.Arg108Ter | P  | JBTS, NPHP, MKS,<br>Nyctalopia | LCA               | c.322C>T,<br>p.Arg108Ter  | c.2991+1665A>G,<br>p.Cys998Ter   | <a href="https://www.ncbi.nlm.nih.gov/pmc/articles/PMC3048164/">https://www.ncbi.nlm.nih.gov/pmc/articles/PMC3048164/</a>               |
| 88139153 | 5 | c.289G>T | p.Glu97Ter  | P  | MKS, JBTS, NPHP,<br>MKS        | MKS               | c.289G>T,<br>p.Glu97Ter   | c.1984C>T,<br>p.Gln662Ter        | <a href="https://www.ncbi.nlm.nih.gov/pmc/articles/PMC2718326/">https://www.ncbi.nlm.nih.gov/pmc/articles/PMC2718326/</a>               |
|          |   |          |             |    |                                | Cone<br>Dystrophy | c.289G>T,<br>p.Glu97Ter   | c.5237G>A,<br>p.Arg1746Gln       | <a href="https://www.ajo.com/article/S0002-9394(19)30551-3/fulltext">https://www.ajo.com/article/S0002-9394(19)30551-3/fulltext</a>     |
| 88139174 | 5 | c.268A>T | p.Lys90Ter  | LP | not provided                   | N/A               |                           |                                  |                                                                                                                                         |
| 88140970 | 3 | c.166C>T | p.Gln56Ter  | P  | NPHP, MKS, JBTS                | N/A               |                           |                                  |                                                                                                                                         |

Table 1. CEP290 ClinVar listed nonsense variants with published genotypes and associated diseases. Class: P – Pathogenic, LP – Likely Pathogenic, VUS – Variant of Uncertain Significance. Diseases: LCA – Leber’s congenital amaurosis, RP – Retinitis Pigmentosa, SECORD – Severe early childhood onset retinal dystrophy, SLS – Senior Loken syndrome, BBS – Bardet-Biedl syndrome, NPHP – Nephronophthisis, JBTS – Joubert syndrome, JSRD – Joubert syndrome and related diseases, MKS – Meckel Gruber syndrome. **Bold font** – homozygous genotypes, *Grey highlight* – Significantly differentially expressed exons. Where genotypes have been published, sources are provided.



Supplementary Table 2.

| Variant        | Exon Number | HOT-SKIP  | Human Splicing Finder |                                     | Splice AI                 |                           |                        |                        |
|----------------|-------------|-----------|-----------------------|-------------------------------------|---------------------------|---------------------------|------------------------|------------------------|
|                |             | Δ ESE/ESS | Δ ESE/ESS             | Donor or Acceptor sites             | Splice acceptor (SA) gain | Splice acceptor (SA) loss | Splice donor (SD) gain | Splice donor (SD) loss |
| c.7153del      | 53          | /         | -2                    | Activation of cryptic acceptor site | 0.00                      | 0.00                      | 0.00                   | 0.00                   |
| c.7073_7077dup | 52          | /         | -11                   | Activation of cryptic acceptor site | 0.00                      | 0.01                      | 0.00                   | 0.00                   |
| c.7048C>T      | 52          | 0         | -6                    | ns                                  | 0.00                      | 0.11                      | 0.00                   | 0.00                   |
| c.6939C>A      | 50          | 0         | -4                    | ns                                  | 0.00                      | 0.00                      | 0.00                   | 0.00                   |
| c.6892C>T      | 50          | 0.2       | -5                    | ns                                  | 0.00                      | 0.00                      | 0.00                   | 0.00                   |
| c.6871C>T      | 50          | 0.25      | ns                    | ns                                  | 0.02                      | 0.00                      | 0.00                   | 0.00                   |
| c.6836T>A      | 50          | -0.54     | ns                    | Activation of cryptic donor site    | 0.00                      | 0.00                      | 0.00                   | 0.00                   |
| c.6798G>A      | 49          | 0         | ns                    | ns                                  | 0.00                      | 0.00                      | 0.00                   | 0.06                   |
| c.6797G>A      | 49          | 0         | -4                    | Activation of cryptic acceptor site | 0.00                      | 0.00                      | 0.00                   | 0.27                   |
| c.6634G>T      | 48          | 3         | -8                    | ns                                  | 0.00                      | 0.00                      | 0.03                   | 0.04                   |
| c.6364A>T      | 47          | 0.8       | -5                    | ns                                  | 0.03                      | 0.18                      | 0.00                   | 0.00                   |
| c.6331C>T      | 46          | 0.67      | -9                    | ns                                  | 0.00                      | 0.00                      | 0.00                   | 0.00                   |
| c.6072C>A      | 44          | 0         | -2                    | ns                                  | 0.00                      | 0.00                      | 0.00                   | 0.00                   |
| c.6031C>T      | 44          | 0.14      | -9                    | Activation of cryptic acceptor site | 0.00                      | 0.01                      | 0.00                   | 0.00                   |
| c.5932C>T      | 43          | 0.33      | -2                    | ns                                  | 0.00                      | 0.01                      | 0.00                   | 0.00                   |
| c.5803G>T      | 42          | -1.08     | -4                    | Activation of cryptic donor site    | 0.00                      | 0.00                      | 1.00                   | 0.00                   |
| c.5788A>T      | 42          | 3         | -9                    | ns                                  | 0.00                      | 0.00                      | 0.00                   | 0.00                   |
| c.5776C>T      | 42          | 0.2       | -2                    | ns                                  | 0.00                      | 0.00                      | 0.01                   | 0.00                   |
| c.5745dup      | 42          | /         | ns                    | ns                                  | 0.00                      | 0.02                      | 0.00                   | 0.01                   |
| c.5707A>T      | 41          | 0.4       | -3                    | ns                                  | 0.00                      | 0.00                      | 0.00                   | 0.02                   |
| c.5704G>T      | 41          | 2         | -11                   | ns                                  | 0.00                      | 0.00                      | 0.00                   | 0.00                   |
| c.5668G>T      | 41          | -0.13     | ns                    | Activation of cryptic donor site    | 0.00                      | 0.00                      | 0.00                   | 0.00                   |
| c.5344C>T      | 39          | 0.6       | -6                    | ns                                  | 0.00                      | 0.00                      | 0.02                   | 0.00                   |

|                         |    |       |     |                                               |      |      |      |      |
|-------------------------|----|-------|-----|-----------------------------------------------|------|------|------|------|
| c.5212G>T               | 38 | 0.14  | -12 | Activation of cryptic donor site              | 0.00 | 0.00 | 0.00 | 0.00 |
| c.5182G>T               | 38 | 1.14  | -5  | ns                                            | 0.00 | 0.00 | 0.00 | 0.00 |
| c.4960C>T               | 37 | 0     | -11 | ns                                            | 0.00 | 0.00 | 0.00 | 0.05 |
| c.4882C>T               | 37 | 0     | -11 | ns                                            | 0.00 | 0.01 | 0.00 | 0.00 |
| c.4811G>A               | 36 | 0     | ns  | ns                                            | 0.00 | 0.00 | 0.00 | 0.00 |
| c.4801C>T               | 36 | -5    | -4  | ns                                            | 0.00 | 0.00 | 0.00 | 0.01 |
| c.4771C>T               | 36 | -5    | -4  | ns                                            | 0.00 | 0.00 | 0.00 | 0.07 |
| c.4732G>T               | 36 | 1     | -10 | ns                                            | 0.01 | 0.02 | 0.00 | 0.00 |
| c.4723A>T               | 36 | -13   | -14 | ns                                            | 0.01 | 0.17 | 0.00 | 0.00 |
| c.4522C>T               | 35 | 3.17  | -7  | ns                                            | 0.19 | 0.00 | 0.00 | 0.00 |
| c.4490C>A               | 35 | 0.33  | -3  | Activation of cryptic donor site              | 0.00 | 0.00 | 0.02 | 0.00 |
| c.4393C>T               | 34 | 2     | -2  | Activation of cryptic acceptor site           | 0.00 | 0.00 | 0.00 | 0.02 |
| c.4276_4277del          | 33 | /     | -6  | Activation of cryptic donor and acceptor site | 0.00 | 0.00 | 0.00 | 0.00 |
| c.4243G>T               | 33 | 0.33  | -11 | Activation of cryptic donor site              | 0.00 | 0.00 | 0.00 | 0.00 |
| c.4186C>T               | 32 | 0     | -11 | ns                                            | 0.00 | 0.00 | 0.00 | 0.05 |
| c.4040G>A               | 32 | 0     | ns  | Activation of cryptic acceptor site           | 0.04 | 0.05 | 0.00 | 0.00 |
| c.3943G>T               | 31 | 2.33  | -13 | Activation of cryptic donor site              | 0.00 | 0.00 | 0.00 | 0.00 |
| c.3904C>T               | 31 | 2.67  | -9  | Activation of cryptic donor site              | 0.00 | 0.00 | 0.09 | 0.00 |
| c.3894dup               | 31 | /     | -2  | Activation of cryptic acceptor site           | 0.00 | 0.00 | 0.00 | 0.00 |
| c.3814C>T               | 31 | 0     | -6  | ns                                            | 0.00 | 0.00 | 0.00 | 0.00 |
| c.3802C>T               | 31 | 8.67  | -5  | ns                                            | 0.00 | 0.00 | 0.00 | 0.00 |
| c.3593C>A               | 31 | -1    | ns  | Activation of cryptic donor and acceptor site | 0.01 | 0.00 | 0.00 | 0.00 |
| c.3420T>G               | 28 | -2.92 | -5  | Activation of cryptic donor and acceptor site |      |      |      |      |
| c.3220G>T               | 28 | -0.14 | -12 | ns                                            | 0.00 | 0.07 | 0.00 | 0.01 |
| c.3205_3206delin<br>sTG | 28 | /     | -6  | ns                                            | 0.00 | 0.00 | 0.00 | 0.00 |

|           |    |       |     |                                               |      |      |      |      |
|-----------|----|-------|-----|-----------------------------------------------|------|------|------|------|
| c.3190del | 28 | /     | -2  | ns                                            | 0.02 | 0.00 | 0.00 | 0.00 |
| c.3175del | 28 | /     | ns  | ns                                            | 0.06 | 0.00 | 0.00 | 0.00 |
| c.3123dup | 28 | /     | ns  | Activation of cryptic acceptor site           |      |      |      |      |
| c.3097A>T | 27 | -0.19 | -2  | ns                                            | 0.00 | 0.00 | 0.00 | 0.00 |
| c.2941C>T | 26 | 9.75  | -4  | Activation of cryptic donor site              | 0.00 | 0.00 | 0.00 | 0.01 |
| c.2911G>T | 26 | 1     | -6  | ns                                            | 0.00 | 0.23 | 0.00 | 0.00 |
| c.2722C>T | 25 | 0.22  | ns  | Activation of cryptic donor site              | 0.00 | 0.00 | 0.00 | 0.00 |
| c.2708T>G | 25 | -3.37 | ns  | ns                                            | 0.00 | 0.01 | 0.00 | 0.00 |
| c.2605C>T | 25 | 10    | ns  | ns                                            | 0.00 | 0.42 | 0.00 | 0.00 |
| c.2351T>A | 22 | -4    | ns  | ns                                            | 0.00 | 0.00 | 0.03 | 0.04 |
| c.2251C>T | 22 | -1.25 | ns  | ns                                            | 0.00 | 0.27 | 0.00 | 0.00 |
| c.2249T>G | 22 | -5.5  | 3   | ns                                            | 0.11 | 0.00 | 0.00 | 0.00 |
| c.1984C>T | 20 | 0     | ns  | Activation of cryptic donor site              | 0.00 | 0.00 | 0.00 | 0.00 |
| c.1936C>T | 20 | 0     | ns  | Activation of cryptic donor site              | 0.00 | 0.27 | 0.00 | 0.01 |
| c.1858G>T | 19 | 0.13  | -16 | ns                                            | 0.00 | 0.02 | 0.00 | 0.00 |
| c.1781T>A | 18 | -0.11 | ns  | ns                                            | 0.00 | 0.01 | 0.00 | 0.63 |
| c.1709C>G | 17 | 0     | ns  | ns                                            | 0.00 | 0.00 | 0.01 | 0.00 |
| c.1645C>T | 17 | 0     | ns  | ns                                            | 0.01 | 0.00 | 0.00 | 0.00 |
| c.1627G>T | 17 | 0.25  | ns  | ns                                            | 0.01 | 0.00 | 0.00 | 0.00 |
| c.1606C>T | 16 | 0     | -6  | ns                                            | 0.00 | 0.00 | 0.00 | 0.57 |
| c.1593C>A | 16 | 0     | ns  | Activation of cryptic donor site              | 0.00 | 0.00 | 0.00 | 0.25 |
| c.1550del | 16 | /     | ns  | ns                                            | 0.13 | 0.00 | 0.00 | 0.00 |
| c.1474A>T | 15 | 3.89  | ns  | Activation of cryptic donor and acceptor site | 0.01 | 0.00 | 0.00 | 0.26 |
| c.1429C>T | 15 | 0     | ns  | ns                                            | 0.00 | 0.00 | 0.00 | 0.00 |
| c.1393del | 15 | /     | ns  | ns                                            | 0.00 | 0.00 | 0.00 | 0.00 |
| c.1390G>T | 15 | 1.25  | -6  | ns                                            | 0.00 | 0.00 | 0.00 | 0.00 |

|           |    |      |     |                                     |      |      |      |      |
|-----------|----|------|-----|-------------------------------------|------|------|------|------|
| c.1078C>T | 13 | 0    | ns  | ns                                  | 0.03 | 0.00 | 0.00 | 0.00 |
| c.1072C>T | 13 | 0.4  | -7  | ns                                  | 0.02 | 0.01 | 0.00 | 0.00 |
| c.881C>G  | 11 | 0.05 | ns  | ns                                  | 0.01 | 0.00 | 0.00 | 0.00 |
| c.829G>T  | 10 | 5    | -16 | ns                                  | 0.00 | 0.00 | 0.10 | 0.02 |
| c.654T>G  | 9  | 2    | ns  | Activation of cryptic acceptor site | 0.00 | 0.00 | 0.00 | 0.02 |
| c.628A>T  | 9  | 1    | ns  | ns                                  | 0.00 | 0.00 | 0.00 | 0.01 |
| c.613C>T  | 9  | 0    | ns  | ns                                  | 0.00 | 0.00 | 0.00 | 0.00 |
| c.508A>T  | 8  | 0.5  | ns  | ns                                  | 0.00 | 0.01 | 0.00 | 0.02 |
| c.451C>T  | 7  | 1.2  | ns  | ns                                  | 0.00 | 0.33 | 0.00 | 0.28 |
| c.367C>T  | 6  | 3.5  | ns  | ns                                  | 0.00 | 0.00 | 0.00 | 0.00 |
| c.322C>T  | 6  | 0.25 | ns  | ns                                  | 0.00 | 0.09 | 0.00 | 0.00 |
| c.289G>T  | 5  | 0.18 | ns  | ns                                  | 0.01 | 0.07 | 0.00 | 0.13 |
| c.268A>T  | 5  | -0.2 | ns  | ns                                  | 0.00 | 0.01 | 0.00 | 0.03 |
| c.166C>T  | 3  | 6    | -3  | ns                                  | 0.00 | 0.00 | 0.00 | 0.36 |

Table 2. Splicing predictions for *CEP290* stop variants from three independent splicing software. ESS – exonic splicing silencer, ESE – exonic splicing enhancer. *Highlighted rows: grey* – variants in symmetric exons, *dark blue* – variants in exons missing in naturally-occurring protein-producing alternative transcripts, *light blue* – both of the prior highlights apply. *Red font* – 2 or 3 of the *in silico* splicing predictions are significant.
