# Supplementary material for: The role of alternative splicing in CEP290-related disease pathogenesis
Source: bioRxiv or medRxiv preprint supplement (doi:10.1101/2022.03.03.22271834), 2022-03-04
Supplement: Supplementary file [file media-2.pdf]

## S2 NCBI SRA Data Information

| Project Accession Number    | Tissue Type | Further Notes | Age   | Run Accession              | Instrument          | Library Prep        | Paired-end data? | Stranded? | mRNA library  | Read Length |
|-----------------------------|-------------|---------------|-------|----------------------------|---------------------|---------------------|------------------|-----------|---------------|-------------|
| <a href="#">PRJEB4337</a>   | Kidney      |               | Adult | <a href="#">ERR315468</a>  | Illumina HiSeq 2000 | Illumina TruSeq v2  | Paired           | N         | polyA         |             |
| <a href="#">PRJEB4337</a>   | Kidney      |               | Adult | <a href="#">ERR315494</a>  | Illumina HiSeq 2000 | Illumina TruSeq v2  | Paired           | N         | polyA         |             |
| <a href="#">PRJEB4337</a>   | Kidney      |               | Adult | <a href="#">ERR315443</a>  | Illumina HiSeq 2000 | Illumina TruSeq v2  | Paired           | N         | polyA         |             |
| <a href="#">PRJEB4337</a>   | Kidney      |               | Adult | <a href="#">ERR315383</a>  | Illumina HiSeq 2000 | Illumina TruSeq v2  | Paired           | N         | polyA         |             |
| <a href="#">PRJEB4337</a>   | Brain       |               | Adult | <a href="#">ERR315477</a>  | Illumina HiSeq 2000 | Illumina TruSeq v2  | Paired           | N         | polyA         |             |
| <a href="#">PRJEB4337</a>   | Brain       |               | Adult | <a href="#">ERR315455</a>  | Illumina HiSeq 2000 | Illumina TruSeq v2  | Paired           | N         | polyA         |             |
| <a href="#">PRJEB4337</a>   | Brain       |               | Adult | <a href="#">ERR315432</a>  | Illumina HiSeq 2000 | Illumina TruSeq v2  | Paired           | N         | polyA         |             |
| <a href="#">PRJEB4337</a>   | Thyroid     |               | Adult | <a href="#">ERR315358</a>  | Illumina HiSeq 2000 | Illumina TruSeq v2  | Paired           | N         | polyA         |             |
| <a href="#">PRJEB4337</a>   | Thyroid     |               | Adult | <a href="#">ERR315412</a>  | Illumina HiSeq 2000 | Illumina TruSeq v2  | Paired           | N         | polyA         |             |
| <a href="#">PRJEB4337</a>   | Thyroid     |               | Adult | <a href="#">ERR315428</a>  | Illumina HiSeq 2000 | Illumina TruSeq v2  | Paired           | N         | polyA         |             |
| <a href="#">PRJEB4337</a>   | Thyroid     |               | Adult | <a href="#">ERR315397</a>  | Illumina HiSeq 2000 | Illumina TruSeq v2  | Paired           | N         | polyA         |             |
| <a href="#">PRJEB4337</a>   | Skin        | Control       | Adult | <a href="#">ERR315401</a>  | Illumina HiSeq 2000 | Illumina TruSeq v2  | Paired           | N         | polyA         |             |
| <a href="#">PRJEB4337</a>   | Skin        | Control       | Adult | <a href="#">ERR315460</a>  | Illumina HiSeq 2000 | Illumina TruSeq v2  | Paired           | N         | polyA         |             |
| <a href="#">PRJEB4337</a>   | Skin        | Control       | Adult | <a href="#">ERR315339</a>  | Illumina HiSeq 2000 | Illumina TruSeq v2  | Paired           | N         | polyA         |             |
| <a href="#">PRJNA280600</a> | Brain       |               | Adult | <a href="#">SRR1957183</a> | Illumina HiSeq 2000 | Illumina TruSeq Str | Paired           | Y         | rRNA depleted | 100bp       |
| <a href="#">PRJNA280600</a> | Cerebellum  |               | Adult | <a href="#">SRR1957125</a> | Illumina HiSeq 2000 | Illumina TruSeq Str | Paired           | Y         | rRNA depleted | 100bp       |
| <a href="#">PRJNA393104</a> | Cerebellum  |               | Adult | <a href="#">SRR5804447</a> | Illumina HiSeq 1500 | NEBNext Ultradirec  | Paired           | Y         | Doesn't say   |             |
| <a href="#">PRJNA393104</a> | Cerebellum  |               | Adult | <a href="#">SRR5804438</a> | Illumina HiSeq 1500 | NEBNext Ultradirec  | Paired           | Y         | Doesn't say   |             |
| <a href="#">PRJNA393104</a> | Cerebellum  |               | Adult | <a href="#">SRR5804423</a> | Illumina HiSeq 1500 | NEBNext Ultradirec  | Paired           | Y         | Doesn't say   |             |
| <a href="#">PRJNA476171</a> | Retina      |               | Adult | <a href="#">SRR7460846</a> | Illumina HiSeq 2500 | Illumina TruSeq Str | Paired           | Y         | rRNA depleted | 125bp       |
| <a href="#">PRJNA476171</a> | Retina      |               | Adult | <a href="#">SRR7460876</a> | Illumina HiSeq 2500 | Illumina TruSeq Str | Paired           | Y         | rRNA depleted | 125bp       |
| <a href="#">PRJNA476171</a> | Retina      |               | Adult | <a href="#">SRR7460899</a> | Illumina HiSeq 2501 | Illumina TruSeq Str | Paired           | Y         | rRNA depleted | 125bp       |
| <a href="#">PRJNA476171</a> | Retina      |               | Adult | <a href="#">SRR7460957</a> | Illumina HiSeq 2502 | Illumina TruSeq Str | Paired           | Y         | rRNA depleted | 125bp       |
